# Supplementary material for: QEEG Signatures are Associated with Nonmotor Dysfunctions in Parkinson's Disease and Atypical Parkinsonism: An Integrative Analysis
Source: PubMed Central journal article supplement (PMC9937709; doi:10.14336/ad.2022.0514), 2023-02-01
Supplement: AD-14-1-204-s.pdf [file AD-14-1-204-s.pdf]

# **QEEG Signatures are Associated with Nonmotor Dysfunctions in Parkinson's Disease and Atypical Parkinsonism: An Integrative Analysis**

**Hailing Liu<sup>1, 2#</sup>, Zifeng Huang<sup>1#</sup>, Bin Deng<sup>1#</sup>, Zihan Chang<sup>1#</sup>, Xiaohua Yang<sup>1</sup>, Xingfang Guo<sup>1</sup>, Feilan Yuan<sup>1</sup>, Qin Yang<sup>1</sup>, Liming Wang<sup>3</sup>, Haiqiang Zou<sup>4</sup>, Mengyan Li<sup>5</sup>, Zhaohua Zhu<sup>6</sup>, Kunlin Jin<sup>7\*</sup>, Qing Wang<sup>1\*</sup>**

# SUPPLEMENTARY DATA

**Supplementary Table 1.** Correlation analysis of EEG indices and all variables in PD, PSP and MSA patients.

| Variable            | Frontal slow-to-fast ratio |        |        |        | Occipital alpha/theta ratio |       |        |        |
|---------------------|----------------------------|--------|--------|--------|-----------------------------|-------|--------|--------|
|                     | PD                         |        | PSP    |        | PD                          |       | MSA    |        |
|                     | r                          | p      | r      | p      | r                           | p     | r      | p      |
| H&Y stage           | -0.034                     | 0.812  | 0.154  | 0.493  | 0.111                       | 0.438 | 0.116  | 0.533  |
| UPDRS-III           | -0.039                     | 0.785  | 0.242  | 0.278  | 0.172                       | 0.229 | 0.183  | 0.324  |
| MMSE                | -0.308                     | 0.026* | -0.451 | 0.035* | 0.005                       | 0.973 | -0.001 | 0.997  |
| NMSS (total)        | -0.077                     | 0.588  | 0.299  | 0.176  | 0.156                       | 0.268 | -0.094 | 0.615  |
| Cardiovascular      | -0.189                     | 0.180  | -0.169 | 0.452  | 0.221                       | 0.115 | -0.216 | 0.243  |
| Sleep/fatigue       | -0.233                     | 0.096  | 0.267  | 0.229  | 0.090                       | 0.527 | 0.007  | 0.969  |
| Mood/apathy         | -0.049                     | 0.732  | 0.434  | 0.043* | 0.141                       | 0.319 | 0.220  | 0.235  |
| Perception/illusion | -0.060                     | 0.670  | 0.465  | 0.029* | 0.087                       | 0.541 | 0.250  | 0.175  |
| Attention/memory    | -0.189                     | 0.179  | 0.107  | 0.634  | 0.173                       | 0.221 | 0.078  | 0.675  |
| Gastrointestinal    | 0.033                      | 0.816  | -0.127 | 0.572  | 0.118                       | 0.403 | 0.117  | 0.532  |
| Urinary             | -0.175                     | 0.214  | 0.077  | 0.734  | 0.051                       | 0.718 | -0.161 | 0.386  |
| Sexual function     | -0.187                     | 0.183  | 0.010  | 0.966  | 0.093                       | 0.511 | -0.082 | 0.662  |
| Miscellaneous       | -0.217                     | 0.123  | 0.083  | 0.081  | 0.039                       | 0.783 | 0.225  | 0.225  |
| HAMA scores         | -0.111                     | 0.435  | 0.108  | 0.631  | 0.246                       | 0.082 | 0.396  | 0.027* |
| HAMD scores         | 0.122                      | 0.391  | 0.325  | 0.140  | 0.070                       | 0.627 | 0.267  | 0.147  |

Abbreviations: r: Spearman's rank correlation coefficient, \*P < 0.05
